# Supplementary material for: Urea hydration from dielectric relaxation spectroscopy: old findings confirmed, new insights gained
Source: Royal Society of Chemistry journal article supplement (doi:10.1039/c5cp07604h), 2015-12-24
Supplement: c5cp07604h1.pdf [file c5cp07604h1.pdf]

## Electronic Supporting Information

### Urea hydration from dielectric relaxation spectroscopy: old findings confirmed, new insights gained

Vira Agieienko<sup>a</sup> and Richard Buchner<sup>b</sup>

<sup>a</sup> Department of Physical Chemistry, Kazan Federal University, Kremlevskaya str. 18, 420008 Kazan, Russia

<sup>b</sup> Institut für Physikalische und Theoretische Chemie, Universität Regensburg, D-93040 Regensburg, Germany

### Supporting tables and figures

**Table S1.** Densities,  $d$ , molarities,  $c$ , and viscosities,  $\eta$ , of aqueous urea solutions at solute molalities,  $m$ , and temperatures of (5, 25 & 45) °C.

| $m / \text{mol kg}^{-1}$ | $d / \text{g cm}^{-3}$ | $c / \text{M}$ | $\eta \cdot 10^3 / \text{Pa s}$ |
|--------------------------|------------------------|----------------|---------------------------------|
| 5 °C                     |                        |                |                                 |
| 1.999                    | 1.03151                | 1.841          | 1.600                           |
| 6.001                    | 1.07834                | 4.757          | 1.853                           |
| 11.995                   | 1.12500                | 7.844          | 2.368                           |
| 25 °C                    |                        |                |                                 |
| 0.100                    | 0.99865                | 0.099          | 0.888                           |
| 0.250                    | 1.00099                | 0.247          | 0.897                           |
| 0.500                    | 1.00482                | 0.488          | 0.905                           |
| 0.998                    | 1.01215                | 0.953          | 0.921                           |
| 1.999                    | 1.02586                | 1.831          | 0.957                           |
| 3.998                    | 1.04963                | 3.384          | 1.045                           |
| 6.001                    | 1.06963                | 4.718          | 1.135                           |
| 9.000                    | 1.09423                | 6.393          | 1.287                           |
| 11.995                   | 1.11408                | 7.768          | 1.442                           |
| 15.006                   | 1.13048                | 8.923          | 1.616                           |
| 17.994                   | 1.14411                | 9.894          | 1.794                           |
| 45 °C                    |                        |                |                                 |
| 1.999                    | 1.01739                | 1.816          | 0.653                           |
| 6.001                    | 1.05920                | 4.672          | 0.776                           |
| 11.995                   | 1.10211                | 7.684          | 0.985                           |

**Table S2.** Amplitudes,  $S_j$ , and relaxation times,  $\tau_j$  / ps, of the resolved modes,  $j = 1...3$ ; static and high-frequency permittivity limits,  $\epsilon_s$  and  $\epsilon_\infty$ , and reduced error function,  $\chi^2$ , obtained as a function of solute molality,  $m$ , for the dielectric spectra of urea in water at (5, 25 and 45) °C.

| $m / \text{mol kg}^{-1}$ | $S_1$ | $S_2$ | $S_3$ | $\tau_1$ | $\tau_2$ | $\tau_3$ | $\epsilon_s$ | $\epsilon_\infty$ | $\chi^2 \cdot 10^3$ |
|--------------------------|-------|-------|-------|----------|----------|----------|--------------|-------------------|---------------------|
| 5 °C                     |       |       |       |          |          |          |              |                   |                     |
| 1.999                    | 21.67 | 62.90 | 2.26  | 31.4     | 14.1     | 1.34     | 91.57        | 4.74              | 43                  |
| 6.001                    | 45.11 | 46.10 | 2.09  | 37.8     | 13.9     | 1.29     | 98.91        | 5.61              | 39                  |
| 11.995                   | 63.37 | 32.99 | 3.10  | 47.3     | 14.5     | 1.18     | 104.78       | 5.33              | 42                  |
| 25 °C                    |       |       |       |          |          |          |              |                   |                     |
| 0.100                    | 0.54  | 71.78 | 4.03  | 18.9*    | 8.45     | 0.54     | 78.73        | 2.38              | 11                  |
| 0.250                    | 2.16  | 70.83 | 3.15  | 19.1*    | 8.38     | 0.29     | 79.19        | 3.04              | 20                  |
| 0.500                    | 3.63  | 69.01 | 1.85  | 19.3*    | 8.56     | 1.78     | 79.74        | 5.25              | 25                  |
| 0.998                    | 8.06  | 65.97 | 5.86  | 19.7*    | 8.60     | 0.56     | 81.24        | 1.34              | 25                  |
| 1.999                    | 15.52 | 60.55 | 2.91  | 20.4     | 8.60     | 0.94     | 83.51        | 4.52              | 39                  |
| 3.998                    | 26.93 | 51.40 | 3.27  | 22.4     | 8.91     | 1.55     | 86.83        | 5.23              | 35                  |
| 6.001                    | 36.40 | 46.13 | 3.71  | 24.0     | 9.01     | 0.90     | 90.54        | 4.29              | 14                  |
| 9.000                    | 47.33 | 38.17 | 4.44  | 26.4     | 9.33     | 0.88     | 93.94        | 3.99              | 18                  |
| 11.995                   | 55.05 | 32.49 | 2.90  | 29.0     | 9.74     | 1.59     | 96.41        | 5.98              | 15                  |
| 15.006                   | 61.40 | 27.85 | 2.37  | 31.5     | 9.84     | 1.72     | 98.13        | 6.50              | 15                  |
| 17.994                   | 65.46 | 25.03 | 4.15  | 34.1     | 10.2     | 0.92     | 99.34        | 4.70              | 20                  |
| 45 °C                    |       |       |       |          |          |          |              |                   |                     |
| 1.999                    | 15.94 | 54.04 | 2.63* | 13.2     | 5.43     | 0.17*    | 76.24        | 3.63              | 24                  |
| 6.001                    | 34.18 | 41.22 | 2.63* | 15.9     | 5.92     | 0.17*    | 82.51        | 4.48              | 58                  |
| 11.995                   | 45.26 | 33.75 | 2.63* | 20.3     | 7.81     | 0.17*    | 88.27        | 6.63              | 82                  |

\* Parameter fixed in fit procedure

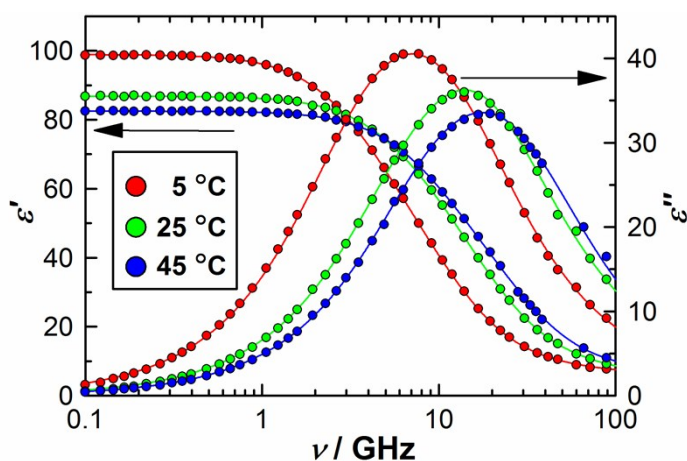

**Fig. S1.** Relative permittivity,  $\epsilon'$ , and dielectric loss,  $\epsilon''$ , spectra of a solution of 6.0 mol kg<sup>-1</sup> urea in water at (5, 25 and 45) °C. Symbols correspond to the experimental data, lines show to the fits with the 3D model. The arrows address the curves to appropriate axes.

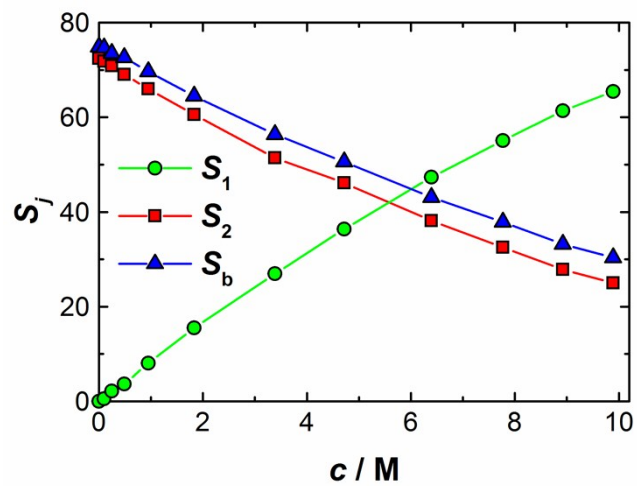

**Fig. S2.** Amplitudes of the solute mode,  $S_1$ , and the  $\alpha$ -relaxation of water,  $S_2$ , as a function of urea concentration,  $c$ , at 25 °C. Also shown is the total amplitude of bulk-like water,  $S_b(c) = S_2(c) + S_3(c) + \varepsilon_\infty(c) - \varepsilon_\infty(0)$ .

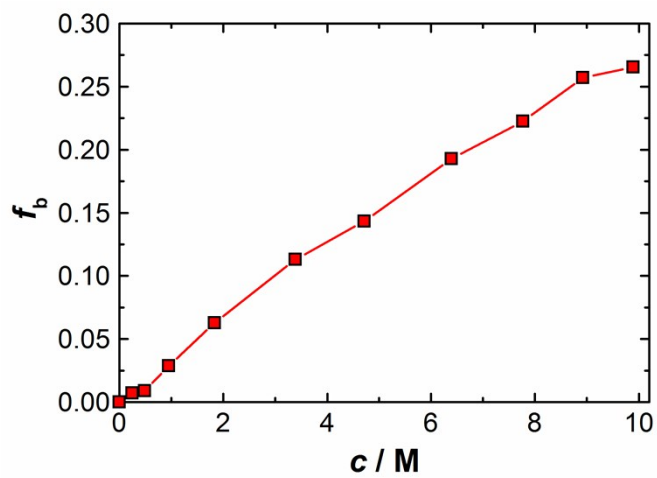

**Fig. S3.** Fraction,  $f_b = c_b / c_w$ , of the solvent not contributing to the amplitude of bulk-like water at 25 °C.
